# Supplementary material for: Investigation of thiolysis of NBD amines for the development of H2S probes and evaluating the stability of NBD dyes
Source: Royal Society of Chemistry journal article supplement (doi:10.1039/c6ob02354a), 2016-01-01

# Supporting Information

## Investigation of Thiolysis of NBD Amines for the Development of H<sub>2</sub>S Probes and Evaluating the Stability of NBD dyes

Fanbo Song,<sup>†a</sup> Zhifei Li,<sup>†b</sup> Jiayuan Li,<sup>b</sup> Shuai Wu,<sup>c</sup> Xianbo Qiu,<sup>b\*</sup> Zhen Xi<sup>c</sup> and Long  
Yi<sup>b\*</sup>

### Table of Contents

|                                         |             |
|-----------------------------------------|-------------|
| <b>1. Supporting figures</b>            | <b>2-8</b>  |
| <b>2. Supporting NMR and MS spectra</b> | <b>9-23</b> |

## 1. Supporting figures

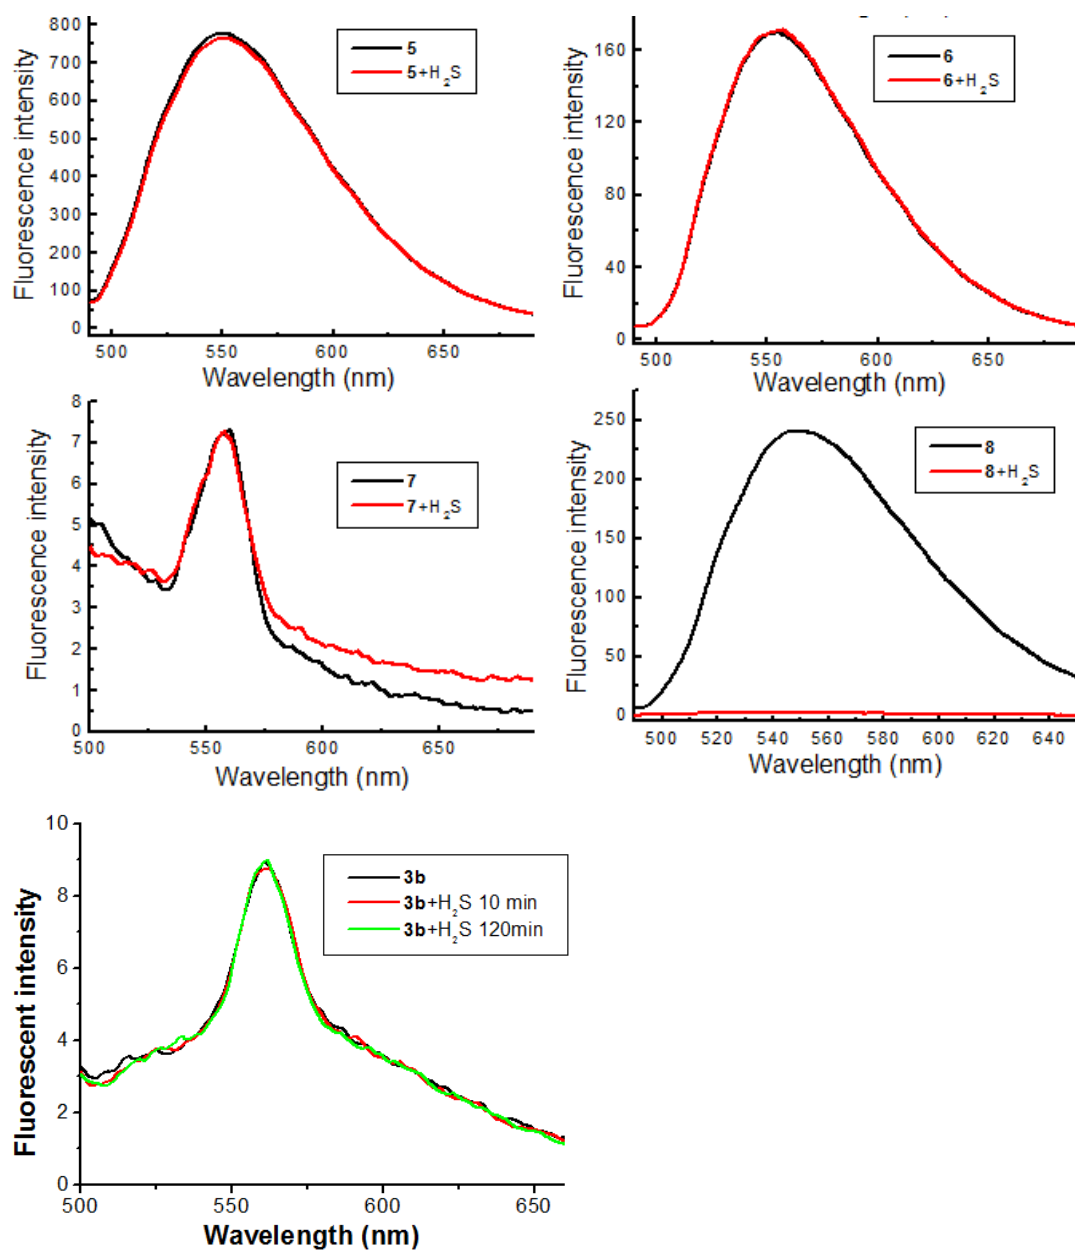

**Figure S1.** Emission spectra of NBD-based probes (**5-8** or **3b** 1  $\mu\text{M}$ ) in the absence (black line) or presence (red line) of 100  $\mu\text{M}$   $\text{H}_2\text{S}$ . Excitation is 470 nm for all tests in PBS buffer (50 mM, pH 7.4, containing 20% DMSO).

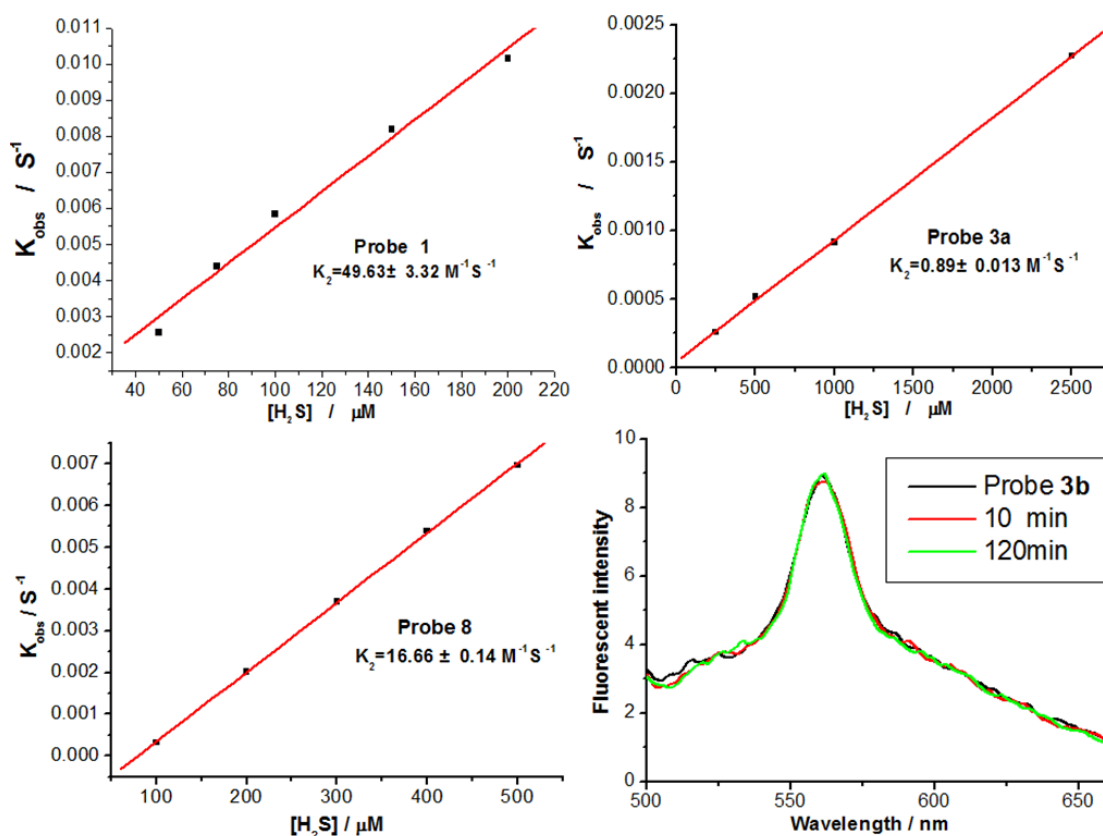

**Figure S2.** Kinetic studies for thiolysis of NBD amines in 1% DMSO-containing PBS. Time-dependent fluorescence intensity at 560 nm (excitation = 470 nm) of probe **1**, **3a**, **8** (1  $\mu\text{M}$ ) upon reaction with different concentrations of  $\text{H}_2\text{S}$  in PBS buffer (pH 7.4). The linear relationship of  $k_{\text{obs}}$  versus  $\text{H}_2\text{S}$  concentrations gives reaction kinetics constant  $k_2$  for **1**, **3a**, **8** and  $\text{H}_2\text{S}$ . The fluorescence spectra of probe **3b** with 200  $\mu\text{M}$   $\text{H}_2\text{S}$  at different reaction time.

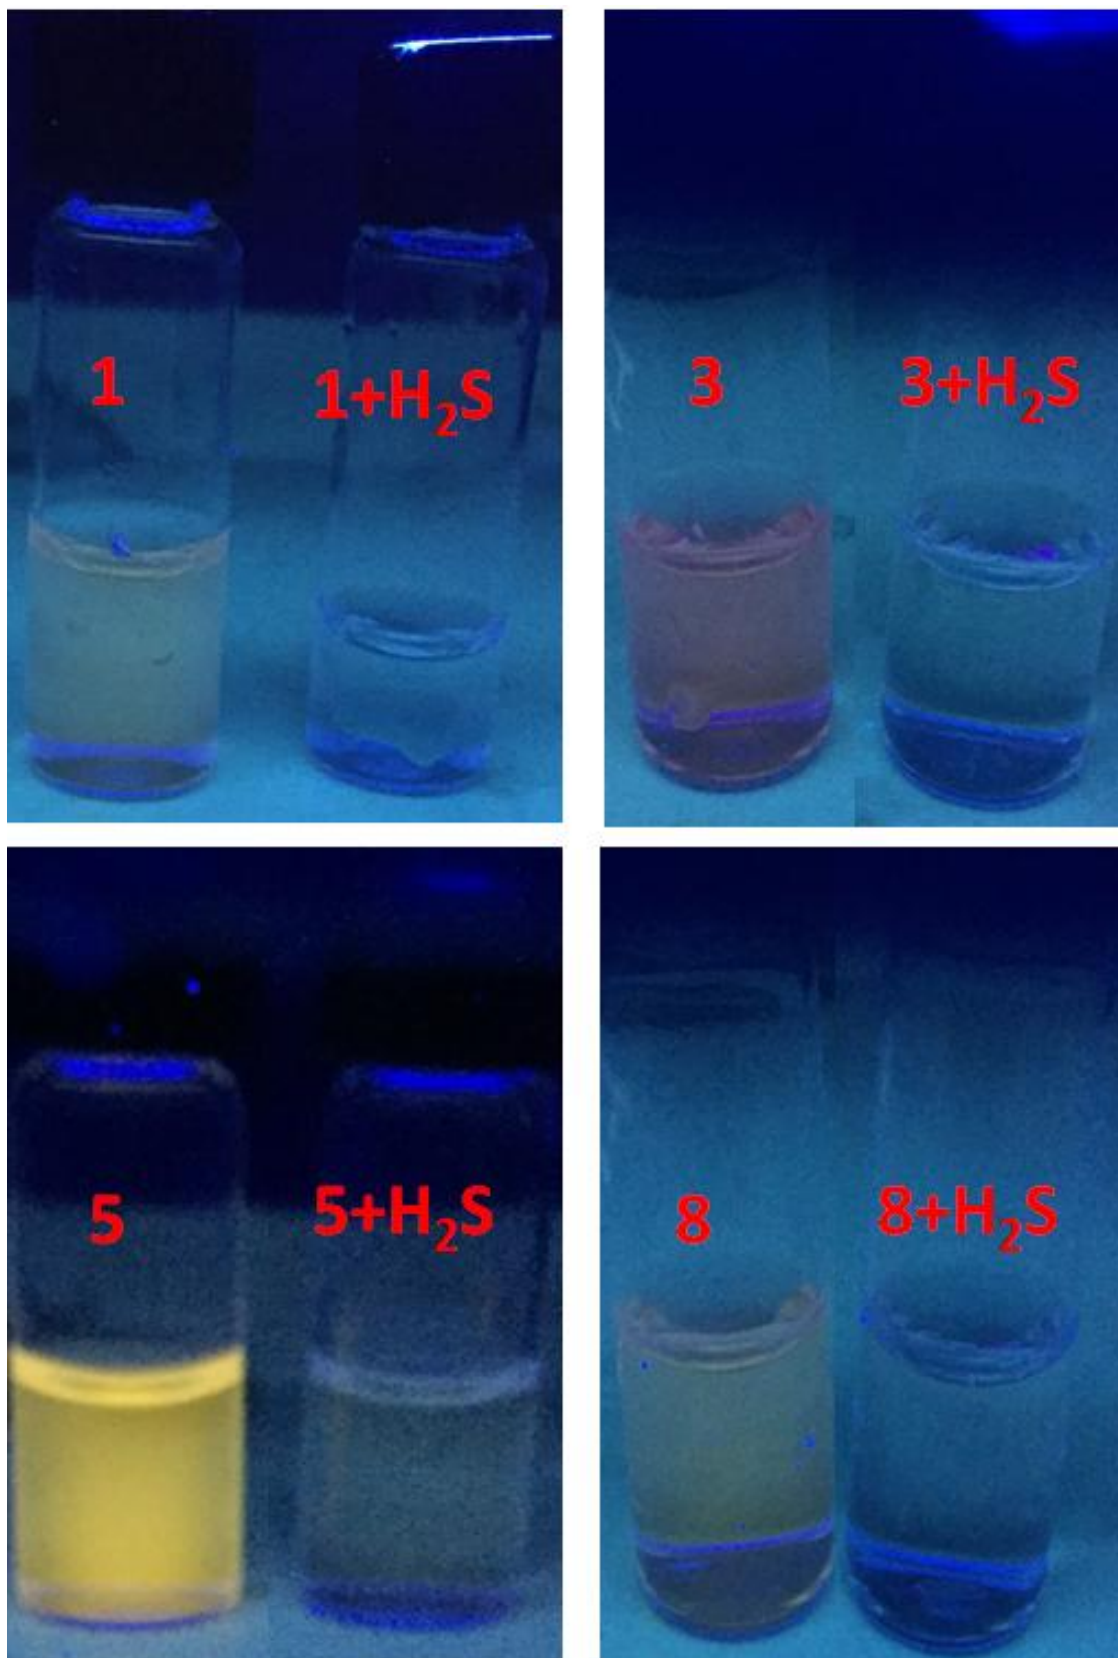

**Figure S3.** Photographs of probes (10  $\mu\text{M}$ ) and their reaction with  $\text{H}_2\text{S}$  (100  $\mu\text{M}$  for **1** or **8**; 2 mM for **3** or **5**) under 365 nm UV lamp.

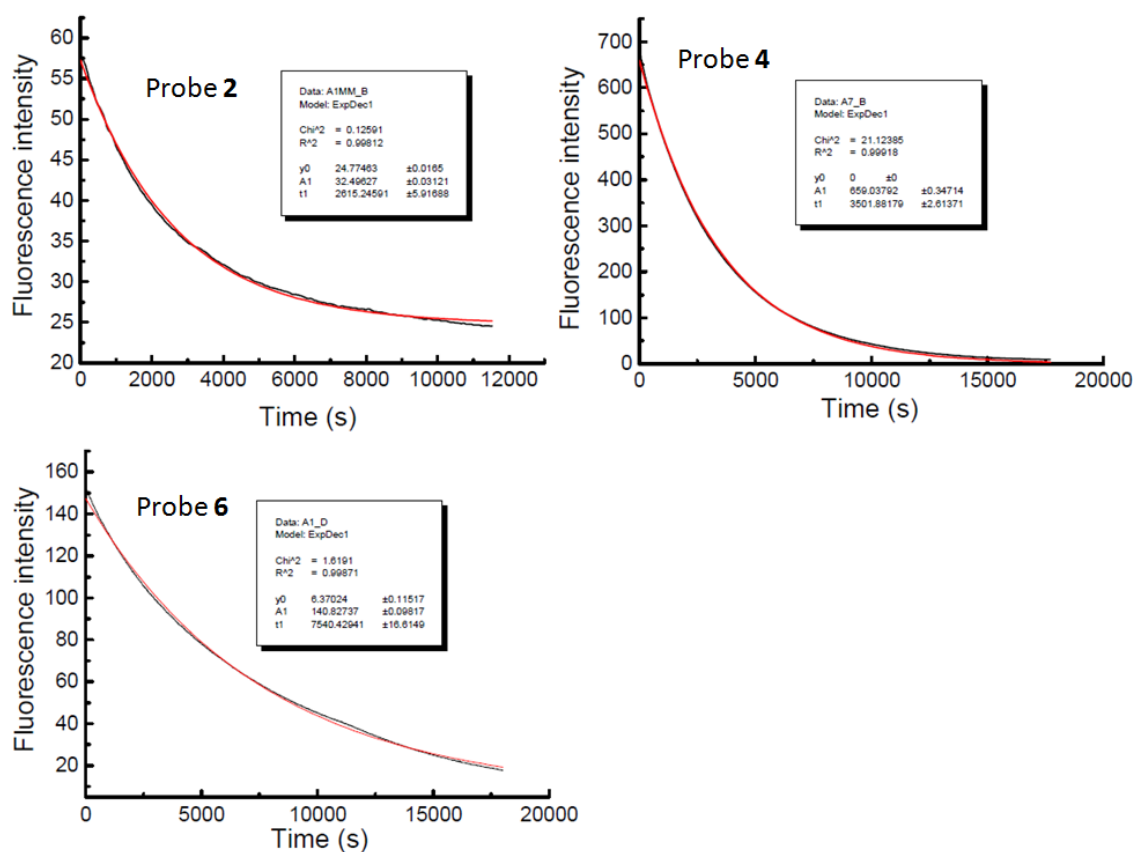

**Figure S4.** Time-dependent emission intensity of probe **2**, **4** or **6** (1  $\mu\text{M}$ ) in the presence of millimolar  $\text{H}_2\text{S}$  in PBS buffer (50 mM, pH 7.4, containing 20% DMSO). The red line represents the best fitting for first-order reaction. (a) 2 mM  $\text{H}_2\text{S}$ ,  $k_{\text{obs}}$ ,  $3.8 \cdot 10^{-4} \text{ s}^{-1}$ . (b) 7 mM  $\text{H}_2\text{S}$ ,  $k_{\text{obs}}$ ,  $2.9 \cdot 10^{-4} \text{ s}^{-1}$ . (c) 7 mM  $\text{H}_2\text{S}$ ,  $k_{\text{obs}}$ ,  $1.3 \cdot 10^{-4} \text{ s}^{-1}$ .

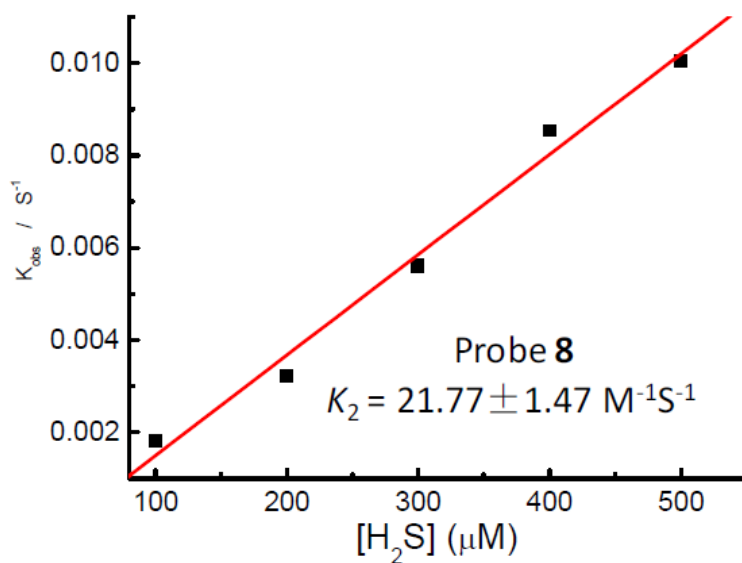

**Figure S5.** Linear relationship between  $k_{\text{obs}}$  and  $\text{H}_2\text{S}$  concentration gives the reaction kinetics of  $21.77 \text{ M}^{-1}\text{s}^{-1}$  for probe **8**.

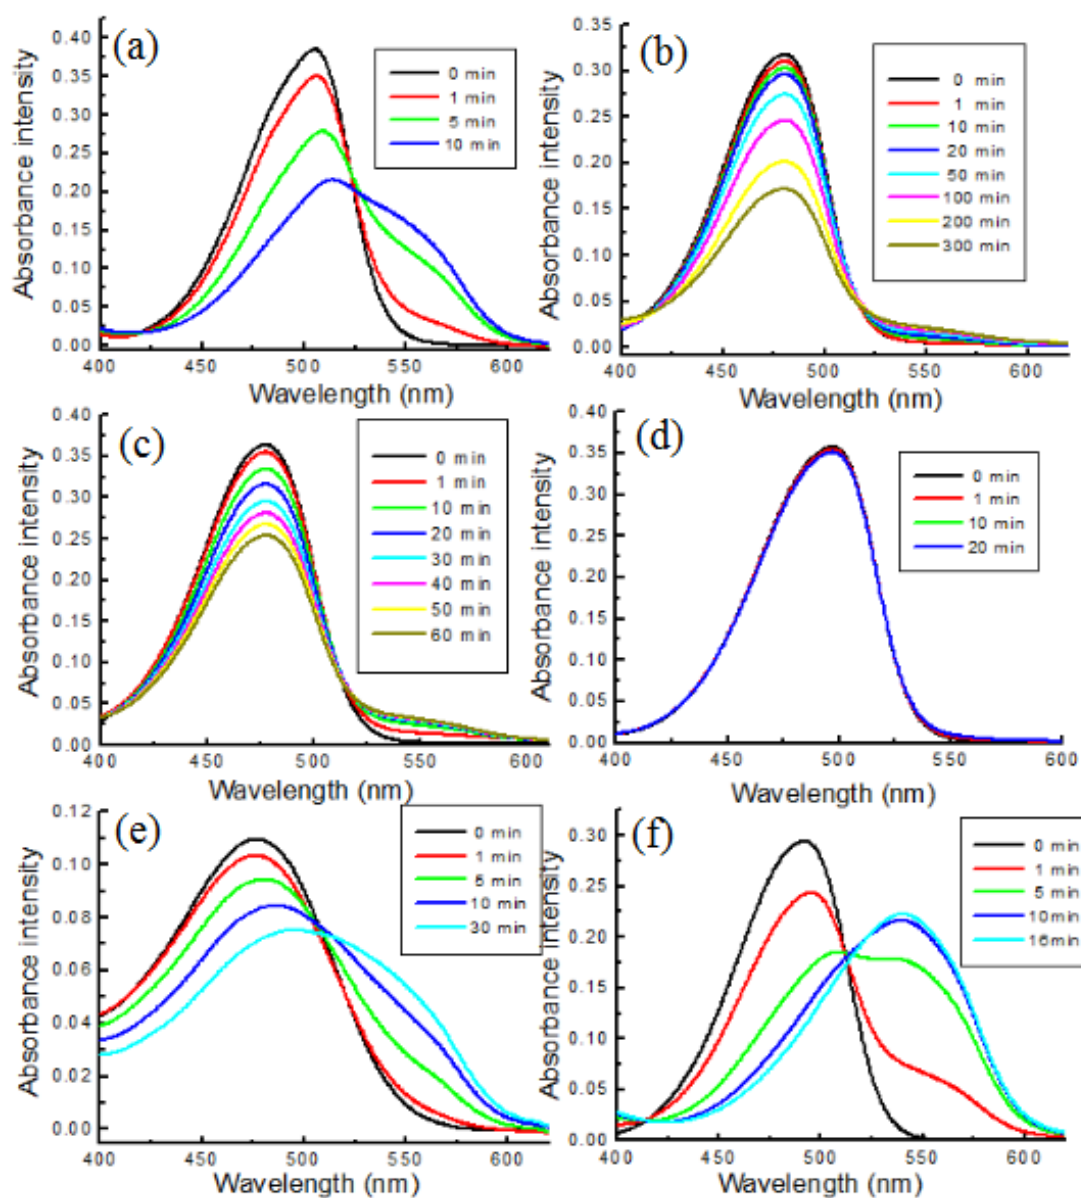

**Figure S6.** The absorbance spectra of probes **3a-8** (10  $\mu\text{M}$ ) in the presence of 100  $\mu\text{M}$  (for **3a** or **8**) or 2 mM  $\text{H}_2\text{S}$  (for **4-7**) in PBS buffer (50 mM, pH 7.4, containing 20% DMSO). (a-f) for probes **3-8**, respectively.

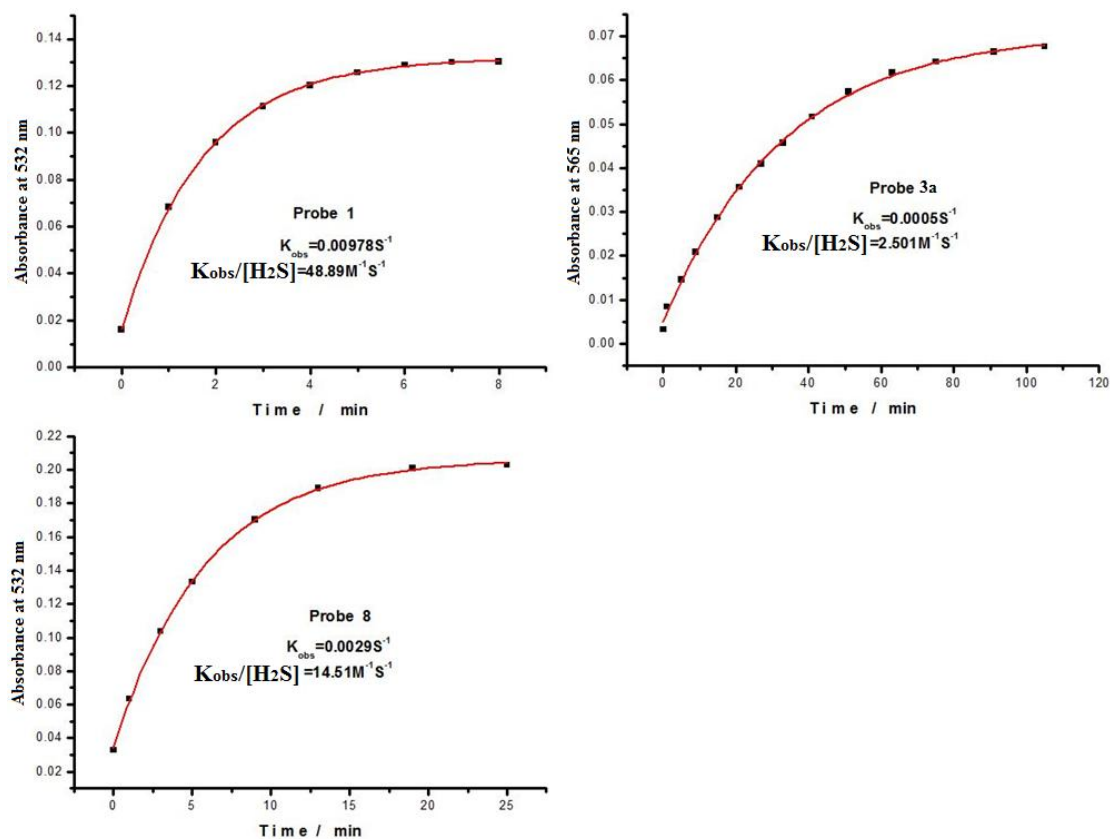

**Figure S7.** The time-dependent absorbance intensity of probes (10  $\mu\text{M}$ ) in the presence of 200  $\mu\text{M}$  in PBS buffer (50 mM, pH 7.4, containing 1% DMSO). The red line represents the best fitting for first-order reaction.

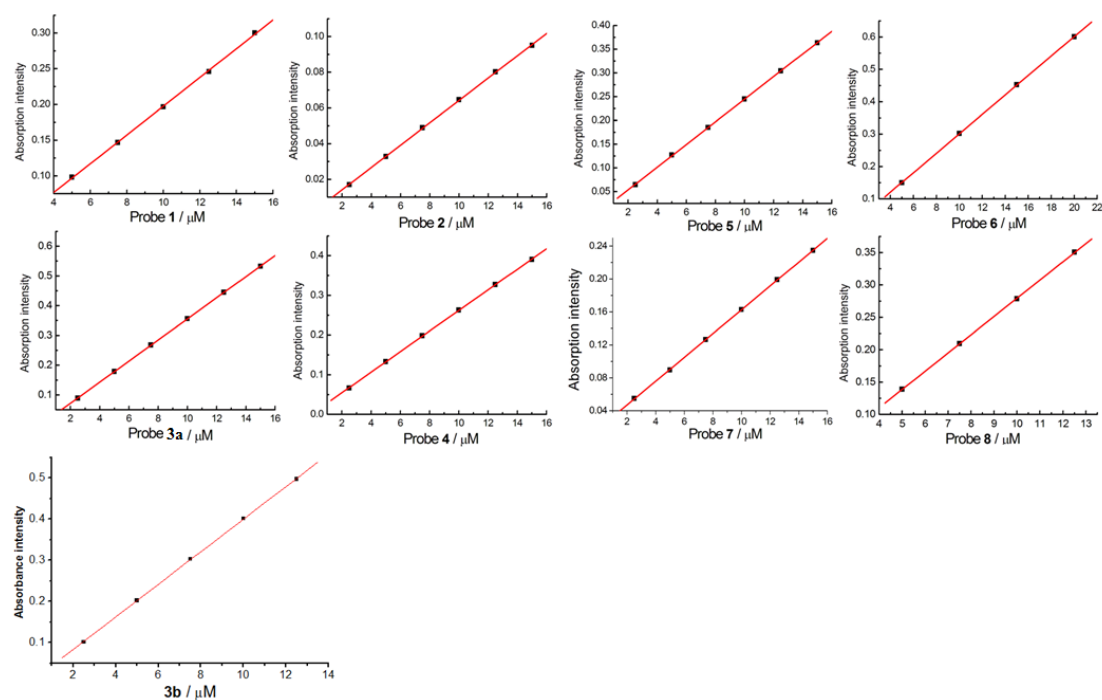

**Figure S8.** Solubility tests of probes **1-8** in PBS buffer (50 mM, pH 7.4, containing 20% DMSO).

The linear relationship between absorption intensity and probe concentrations indicated the good solubility for all probes up to at least 16  $\mu\text{M}$ .

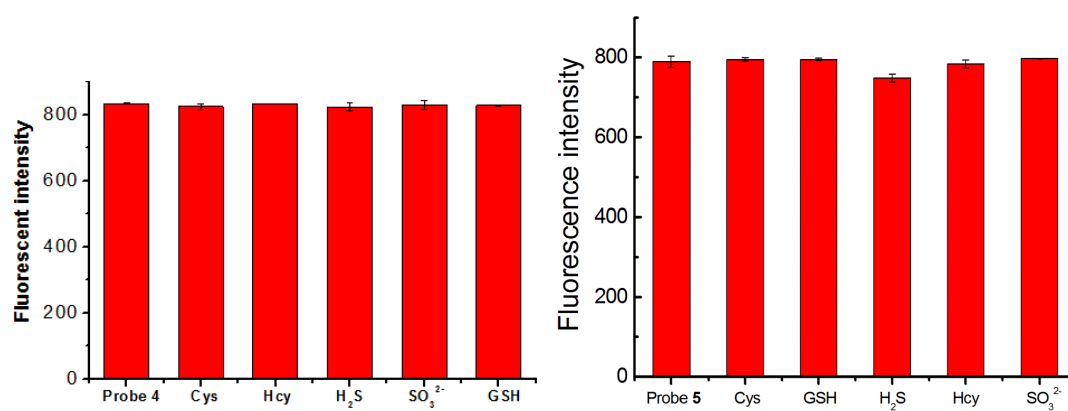

**Figure S9.** Fluorescent intensity at 560 nm for probes (1  $\mu\text{M}$ ) toward different biothiols in PBS buffer. H<sub>2</sub>S or SO<sub>3</sub><sup>2-</sup>, 100  $\mu\text{M}$ ; Cys, GSH or Hcy, 1 mM. Reactions were performed for 60 min at room temperature.



## 2. Supporting NMR and MS spectra

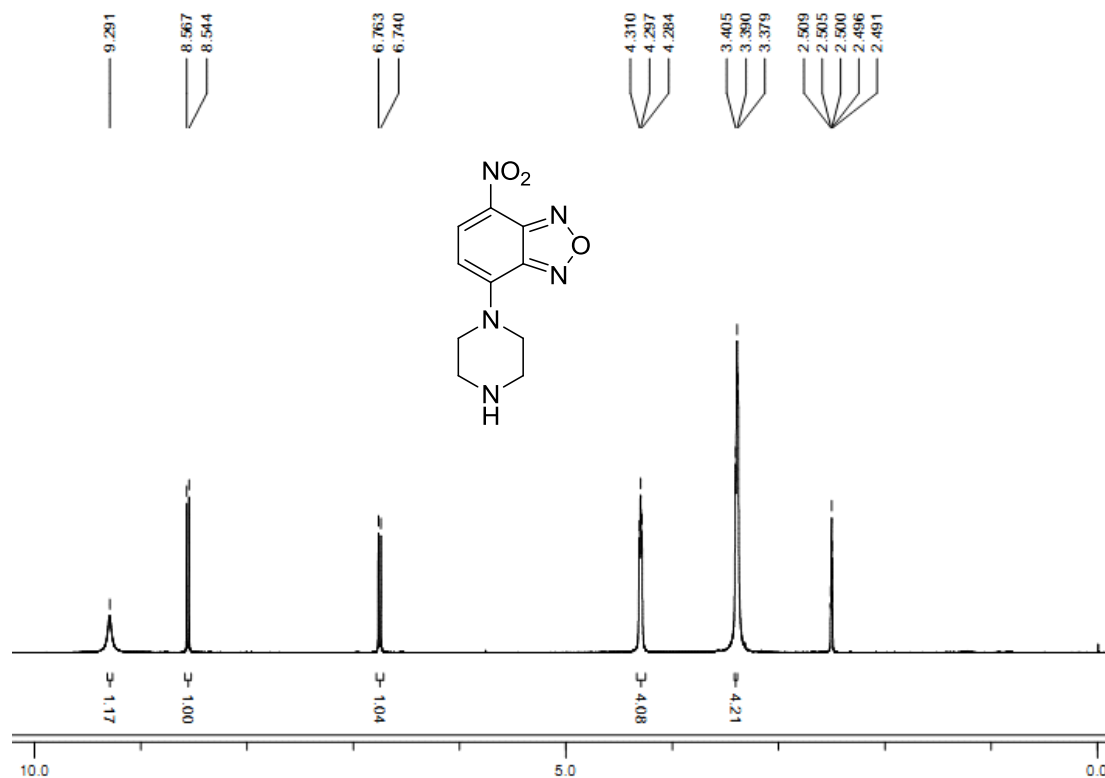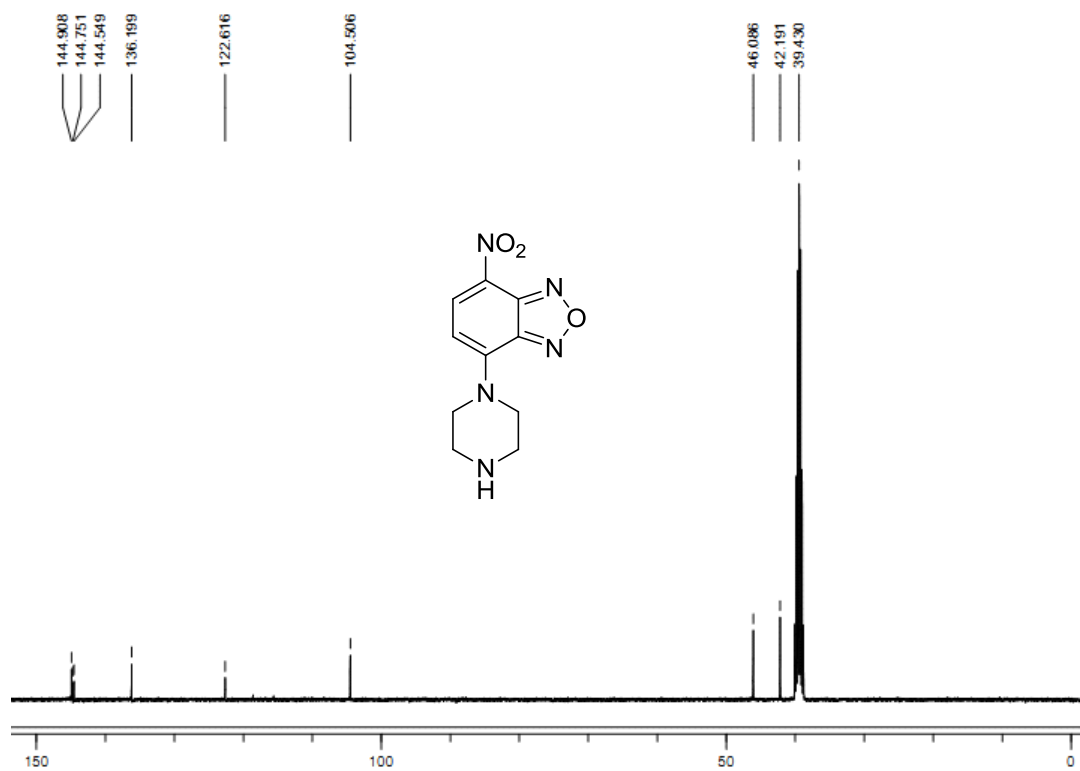

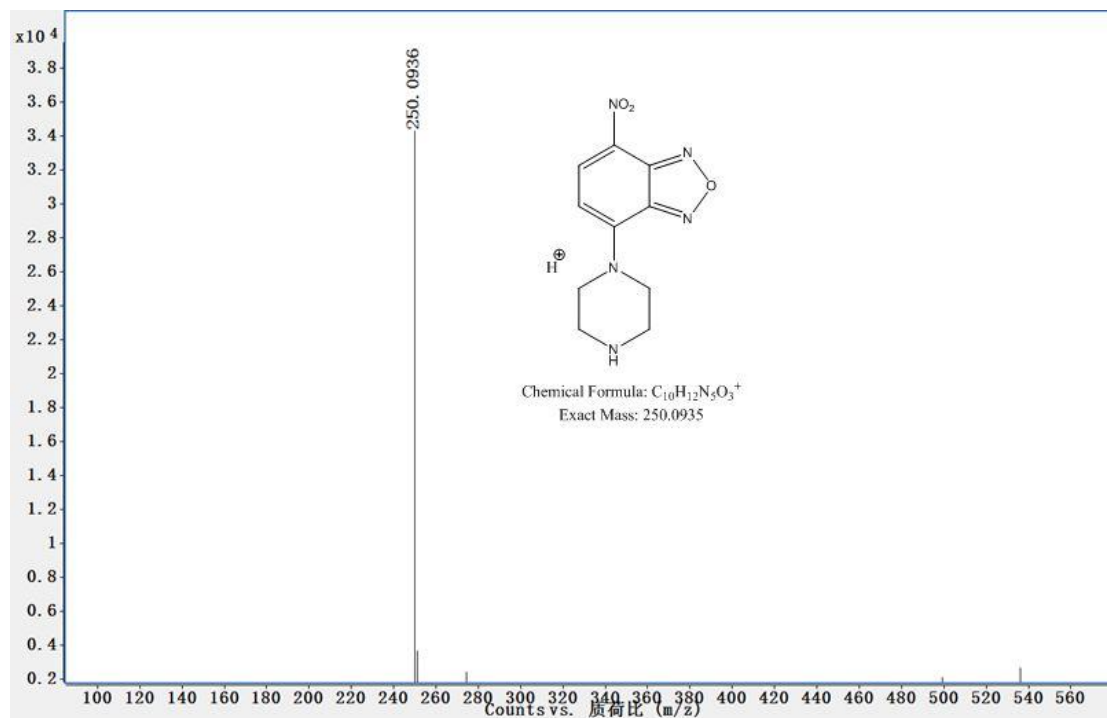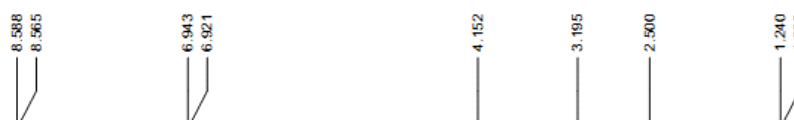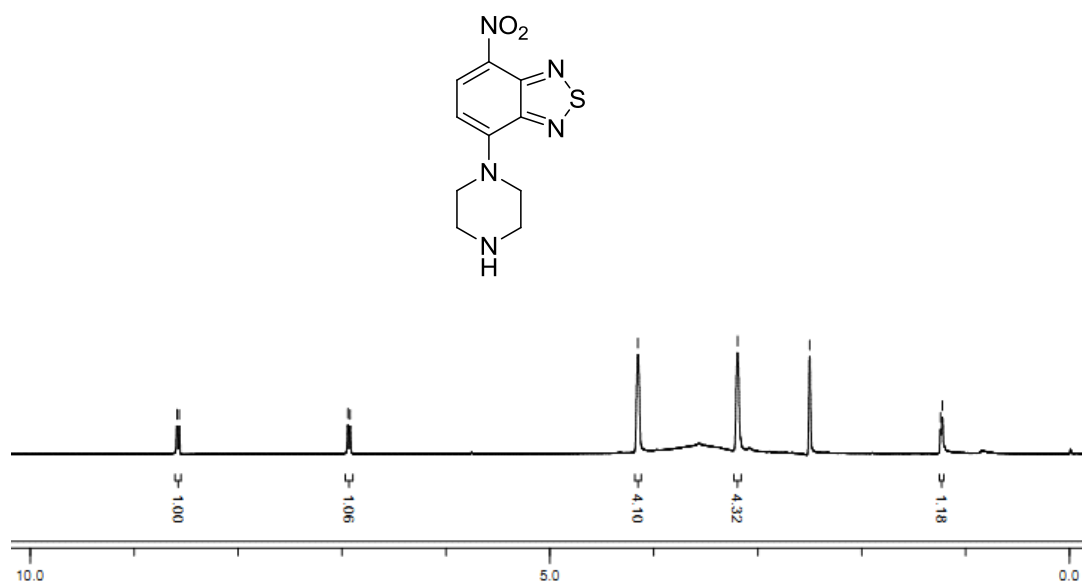

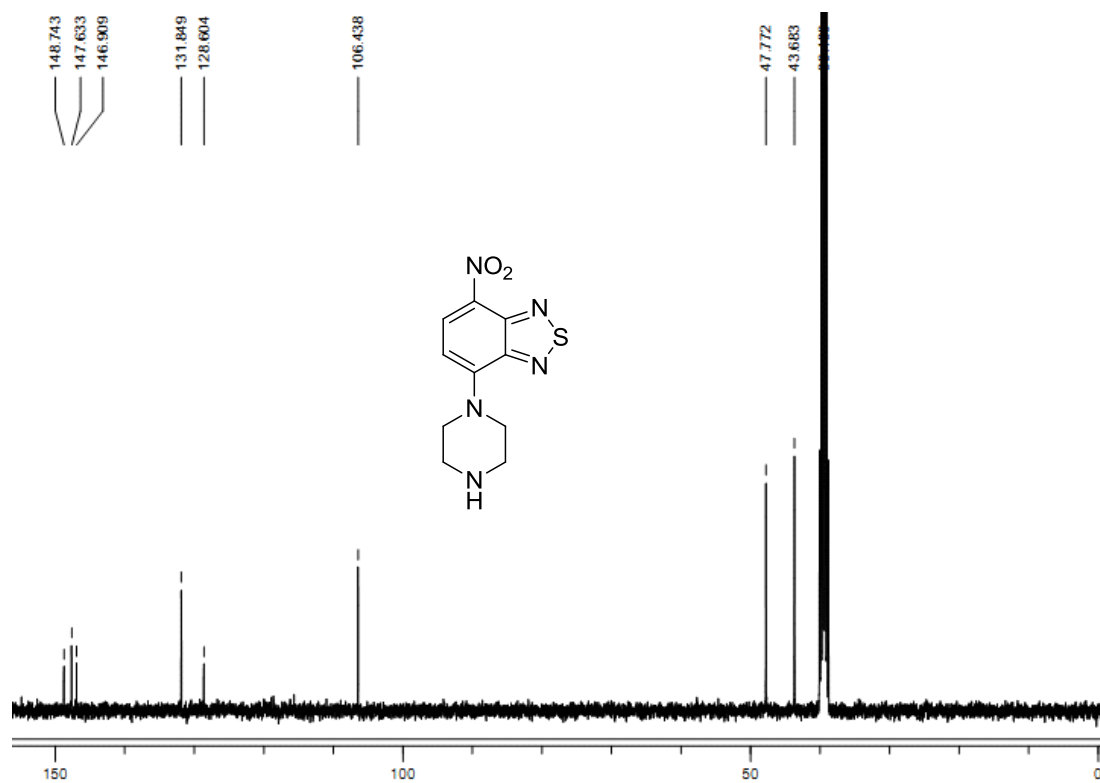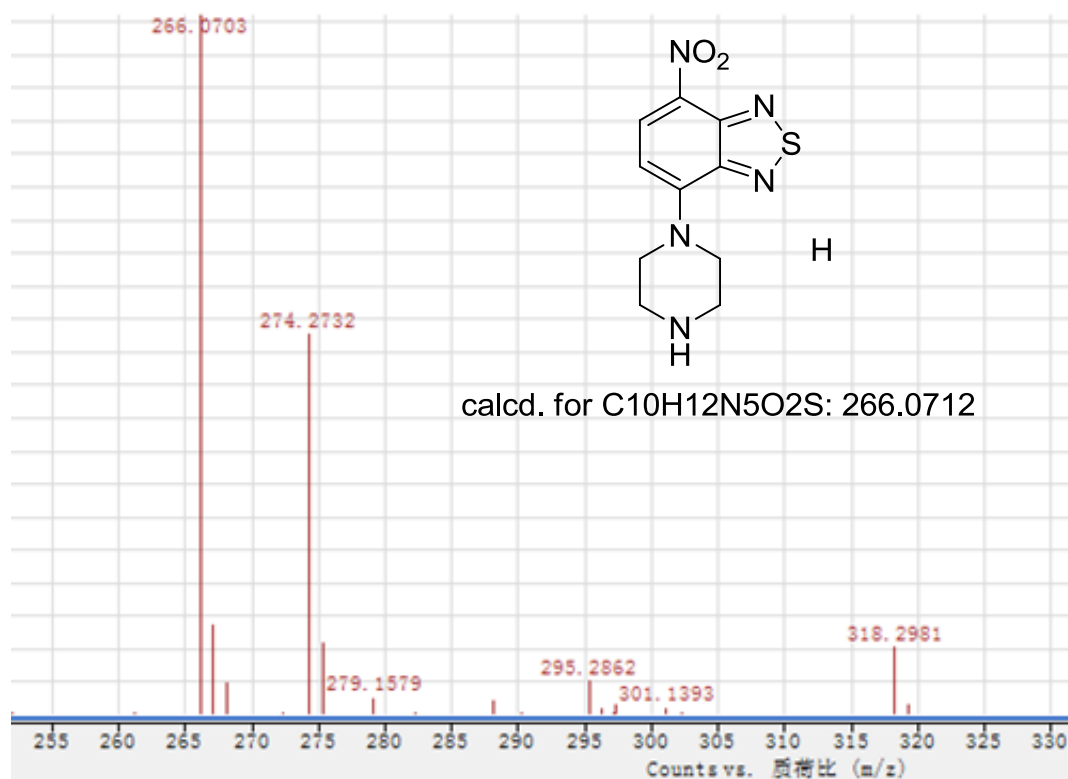

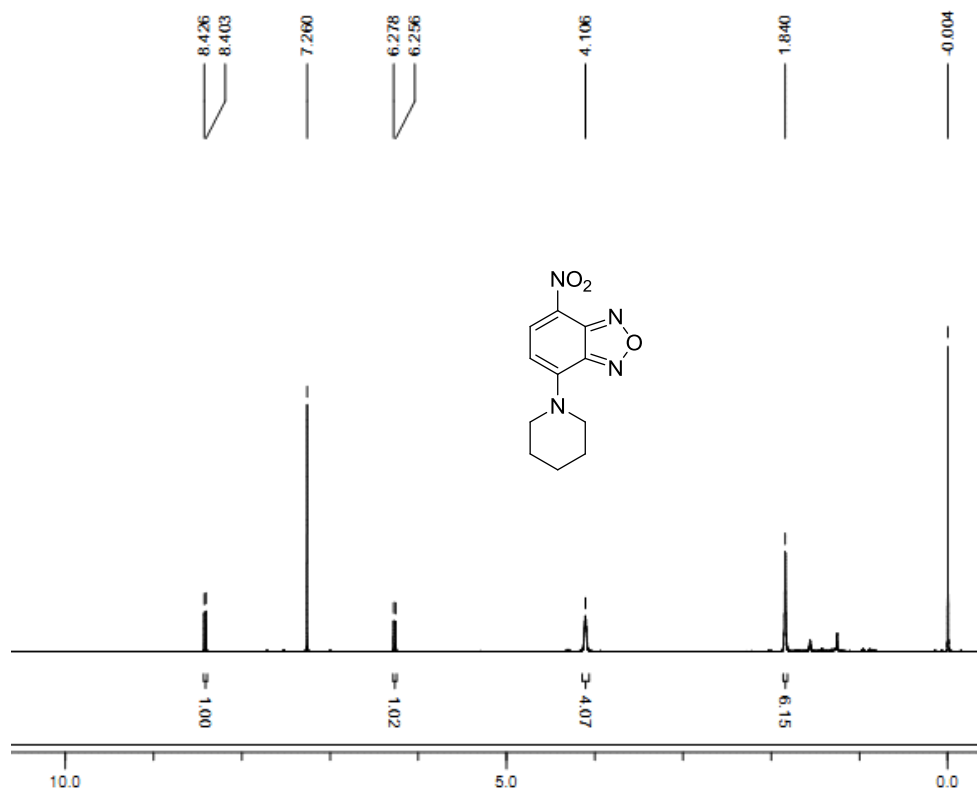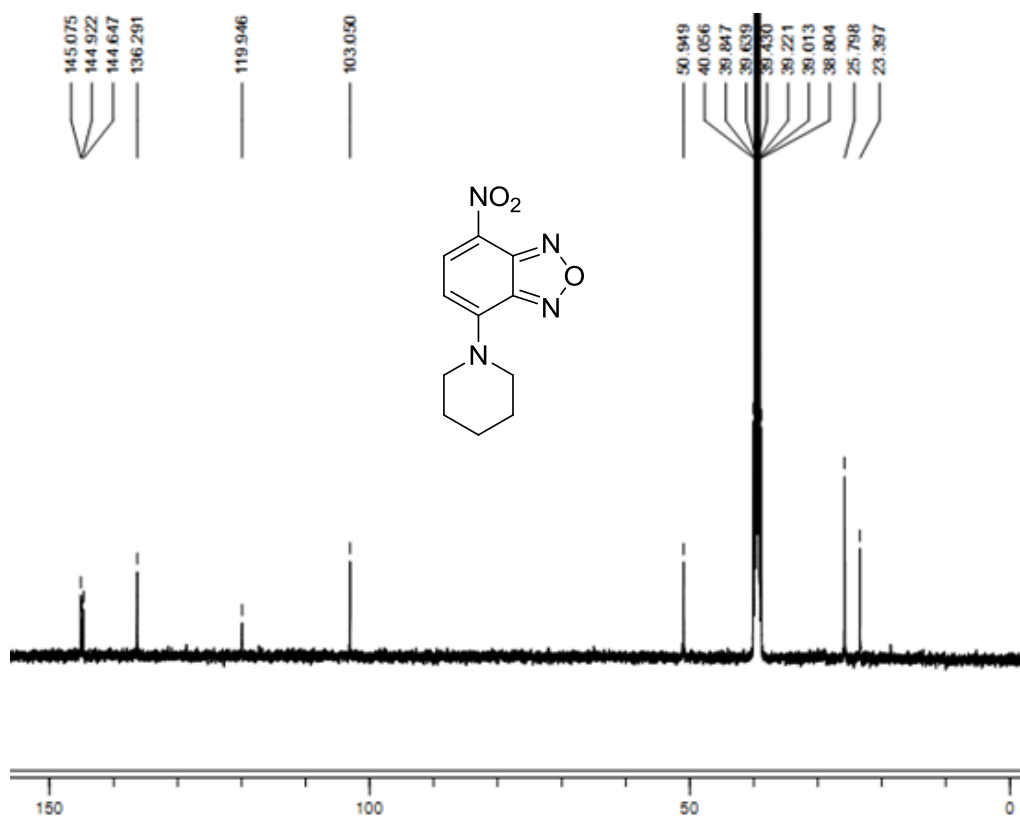

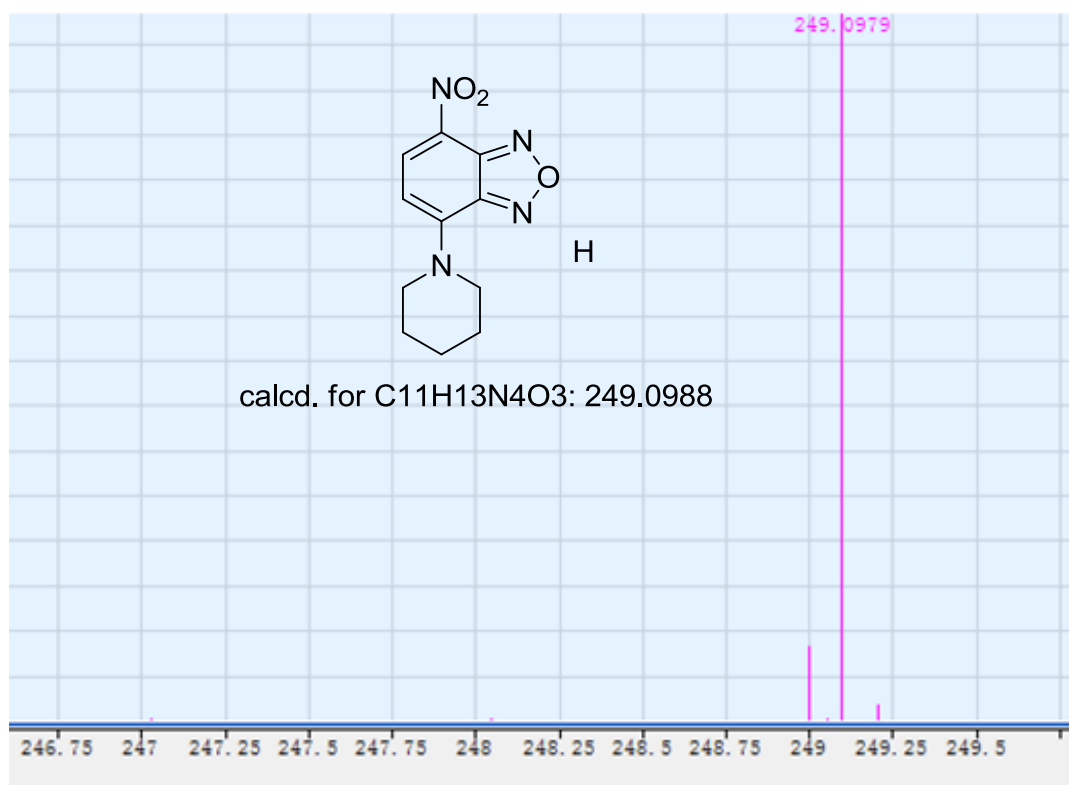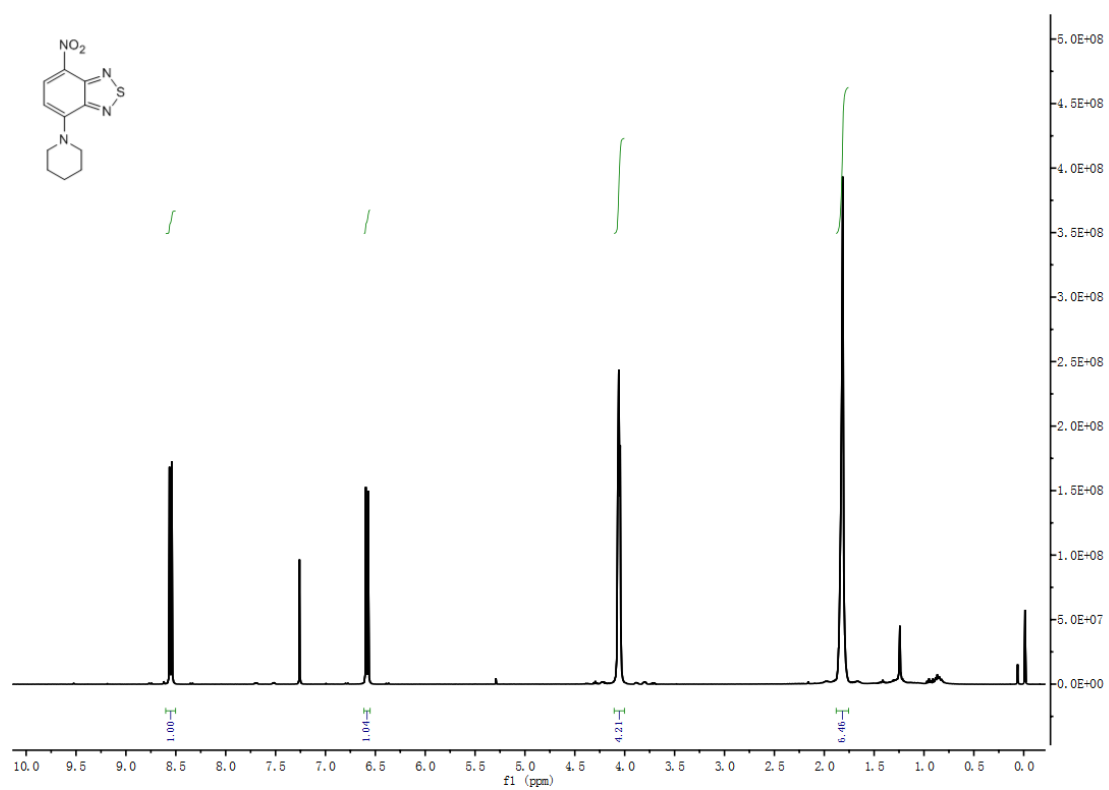

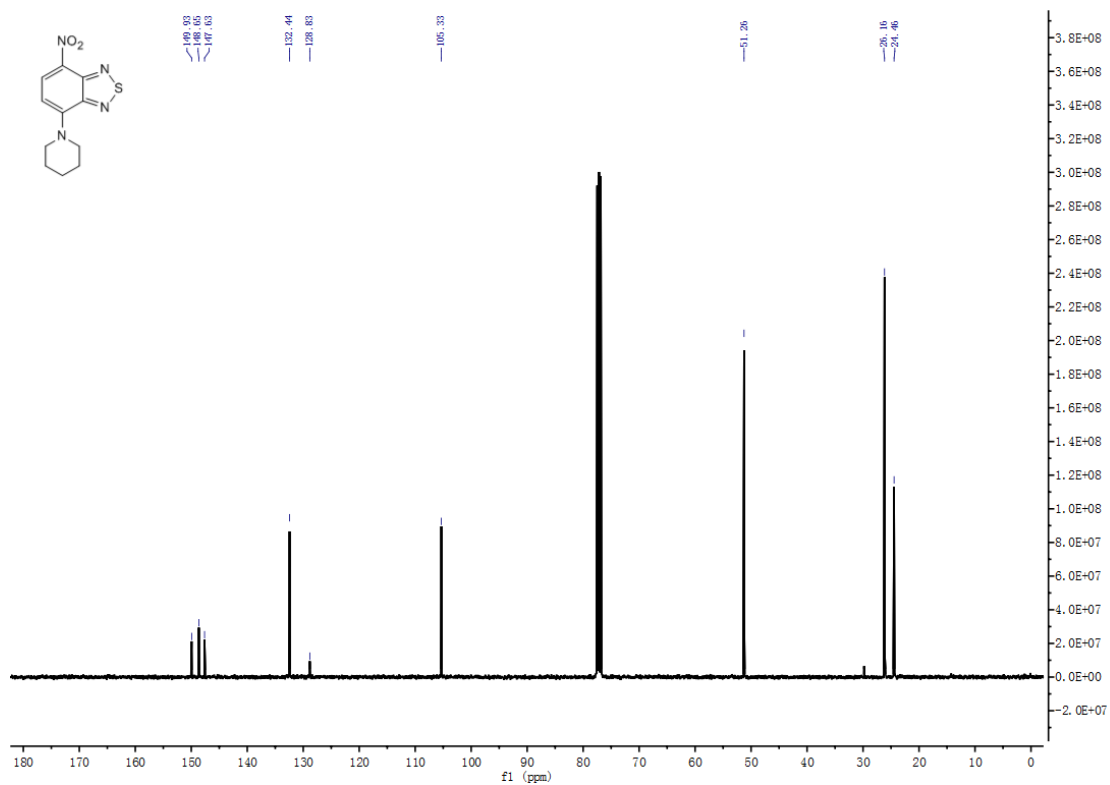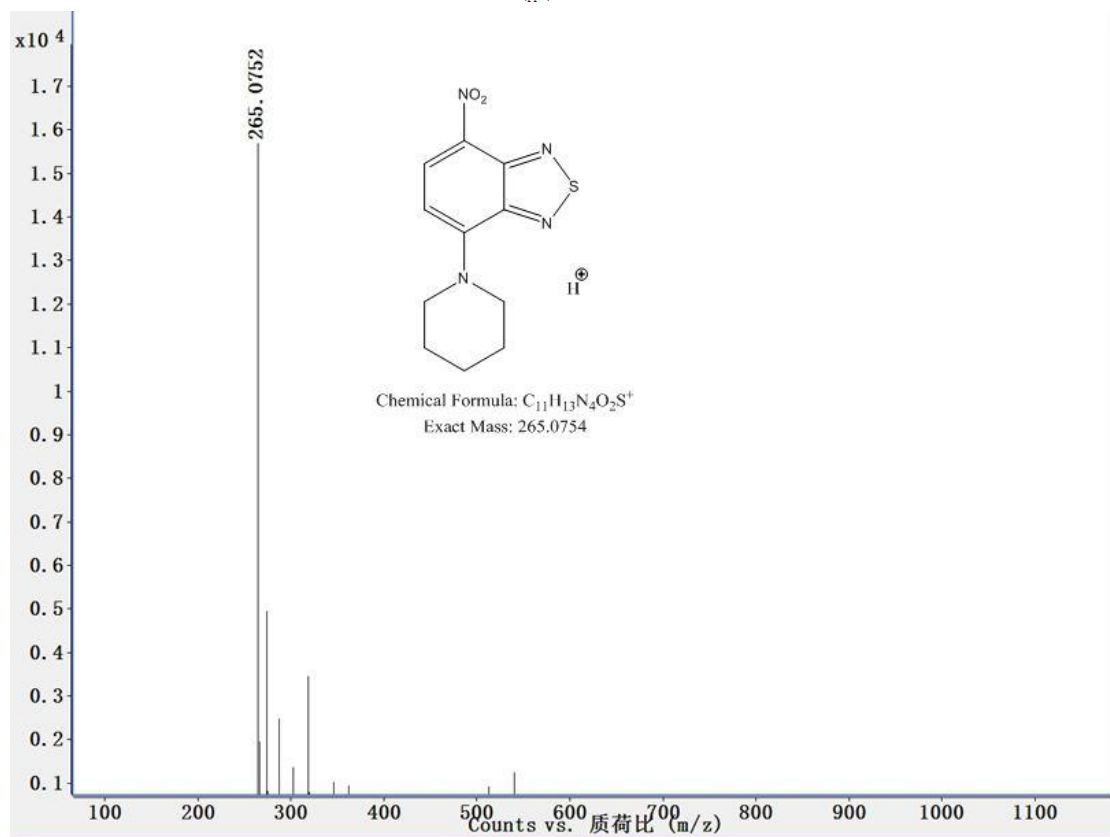

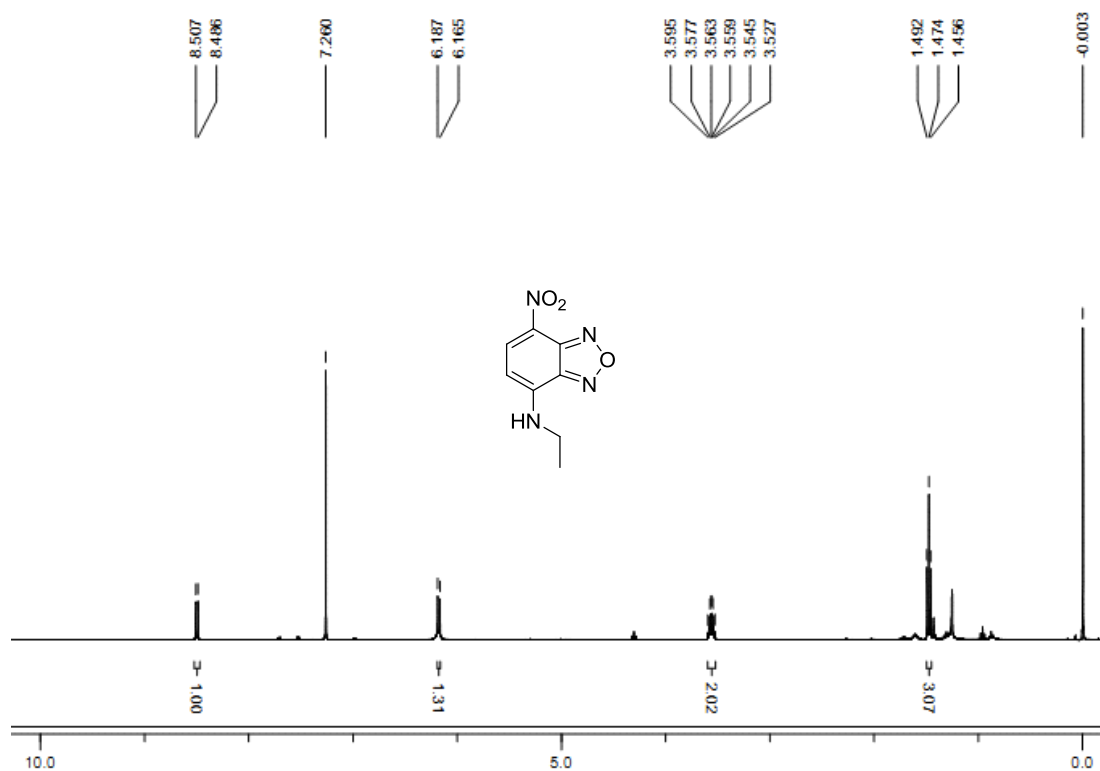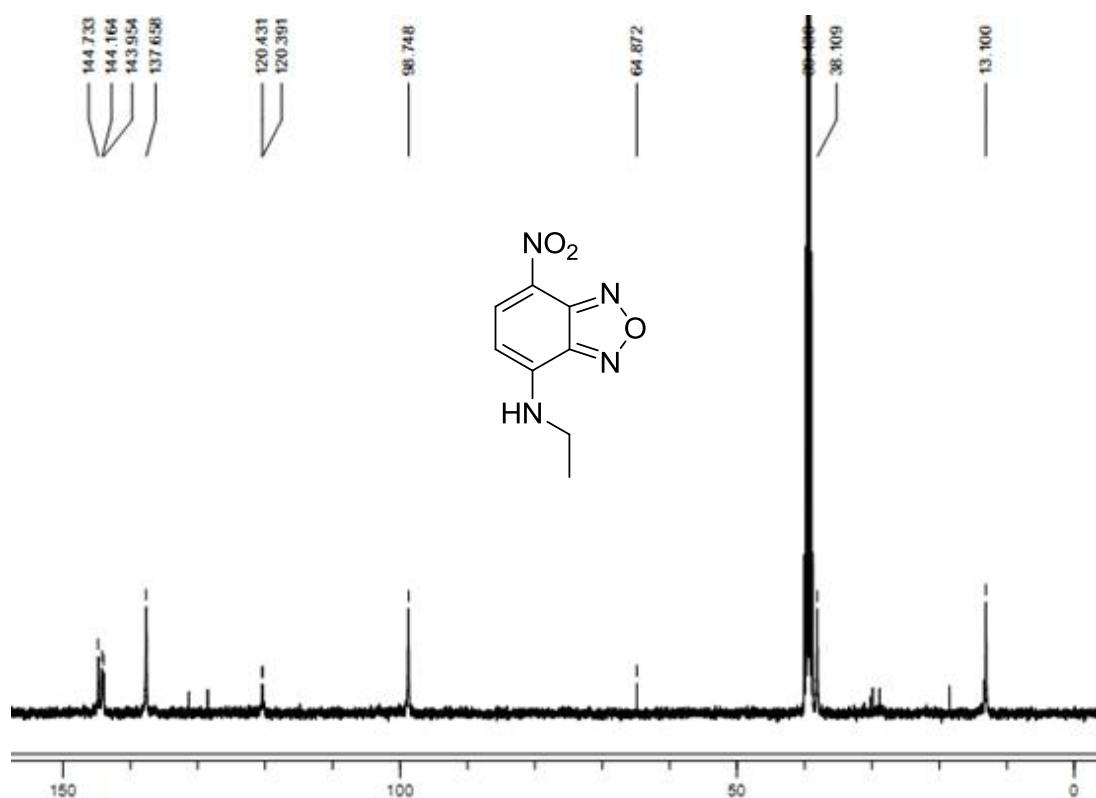

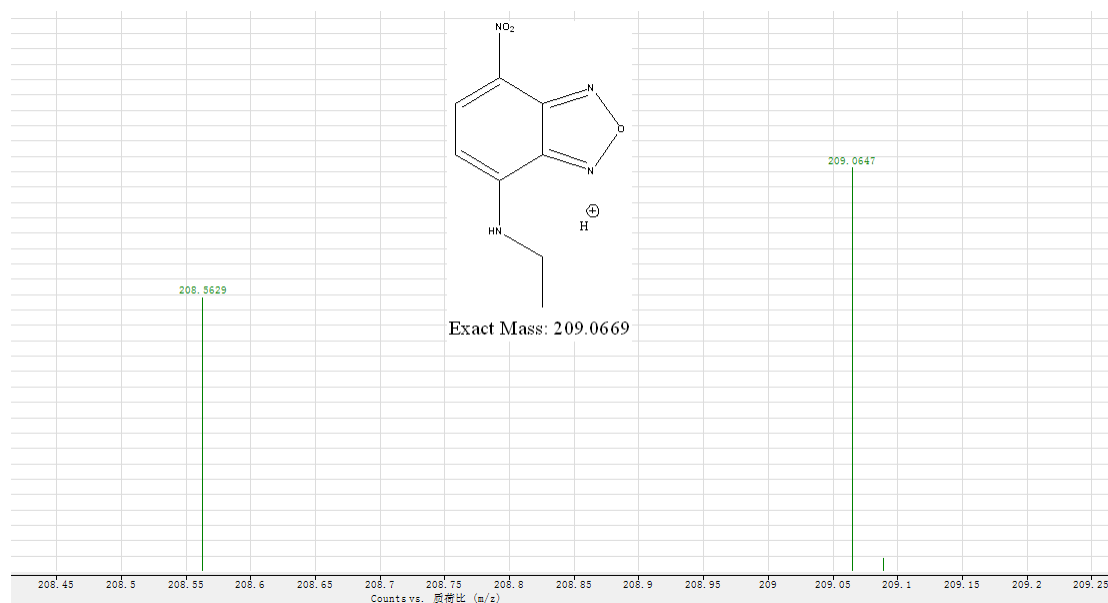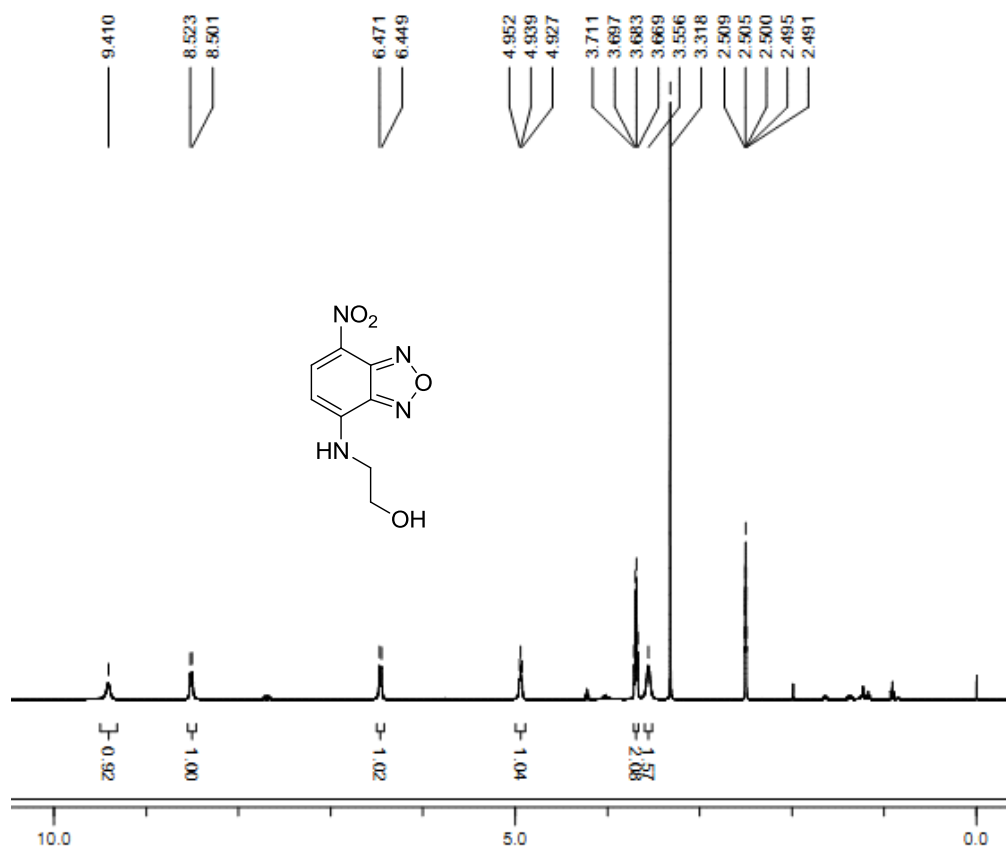



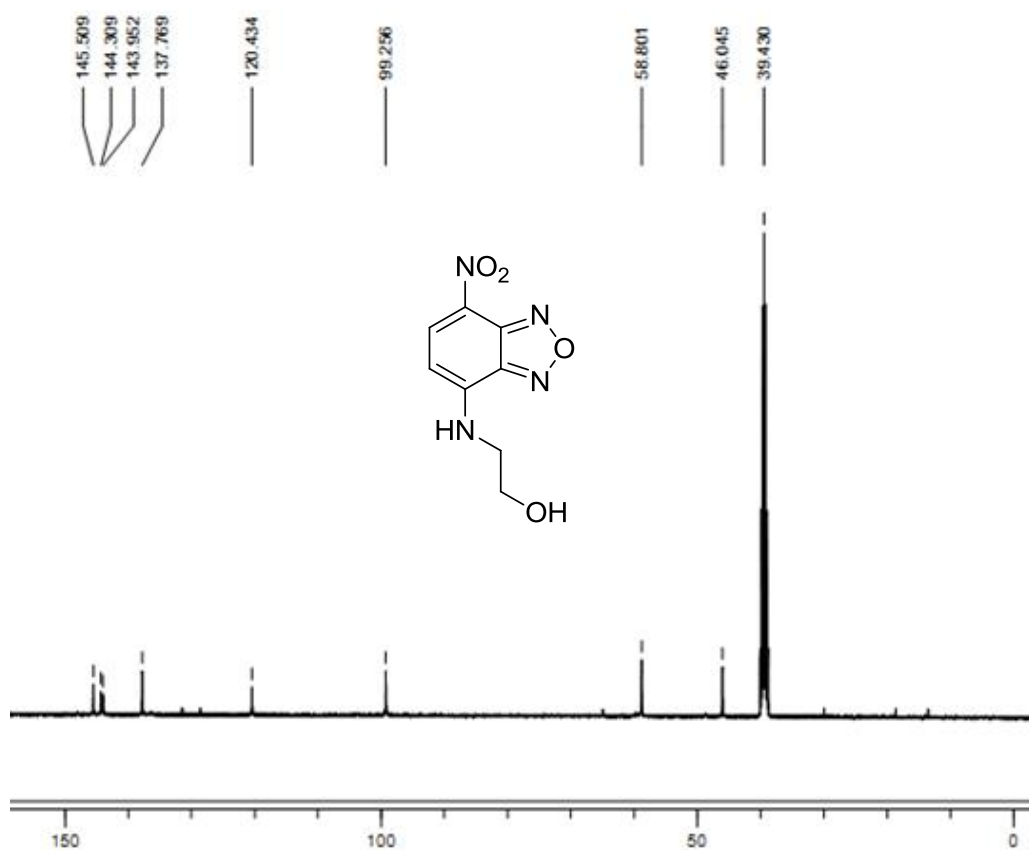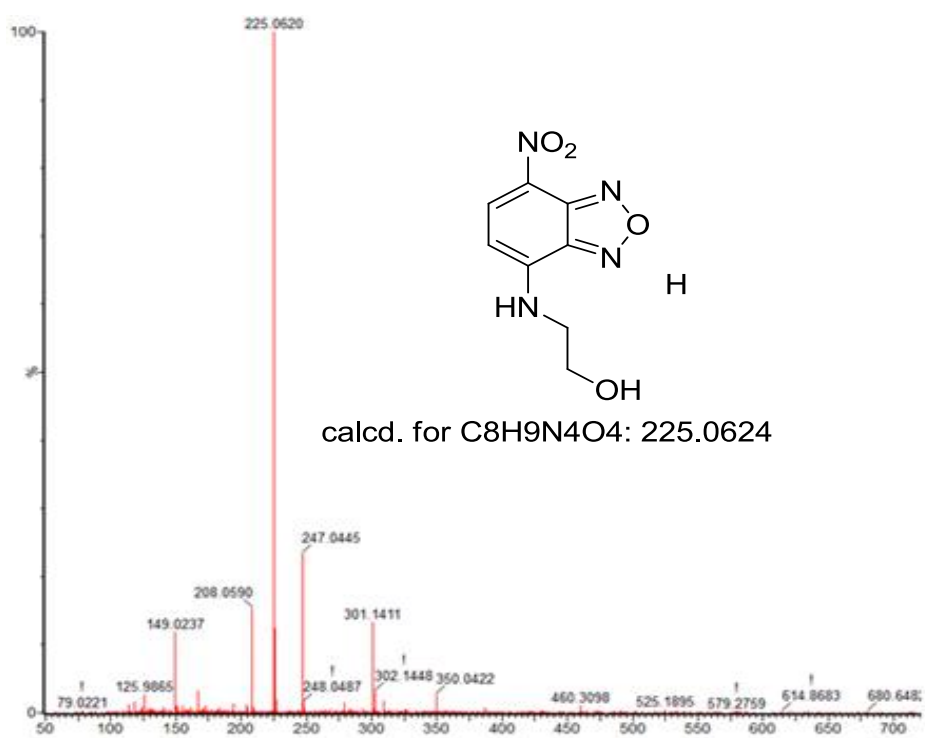

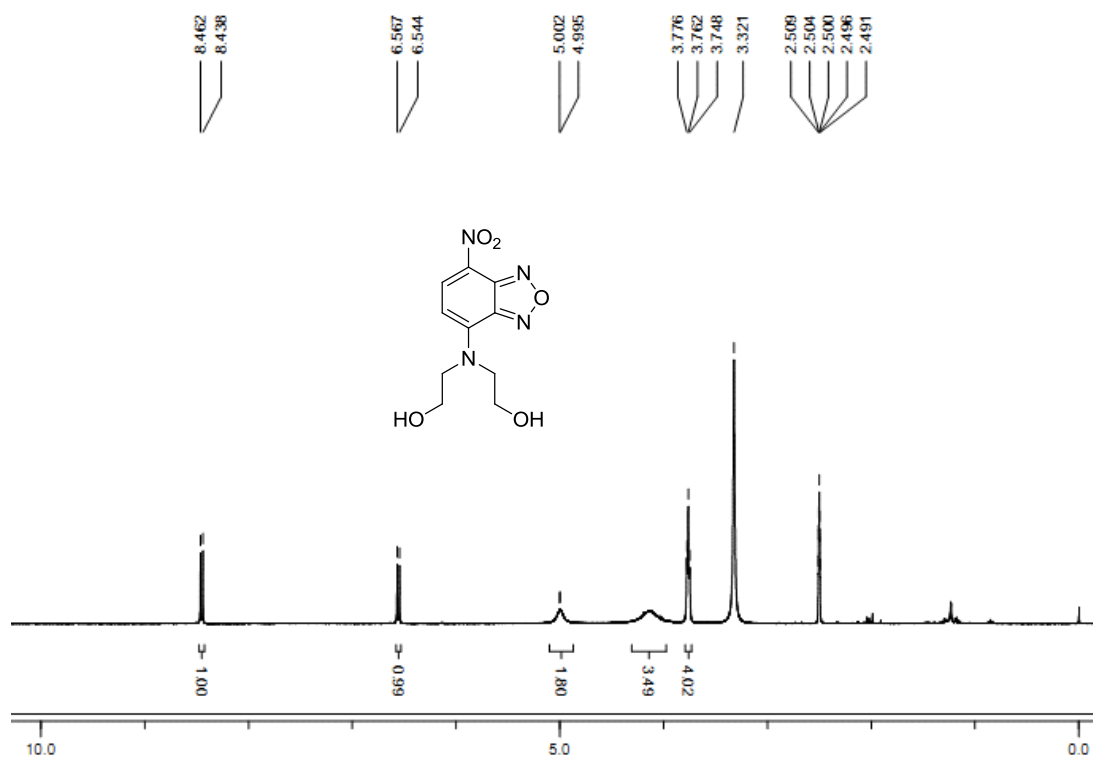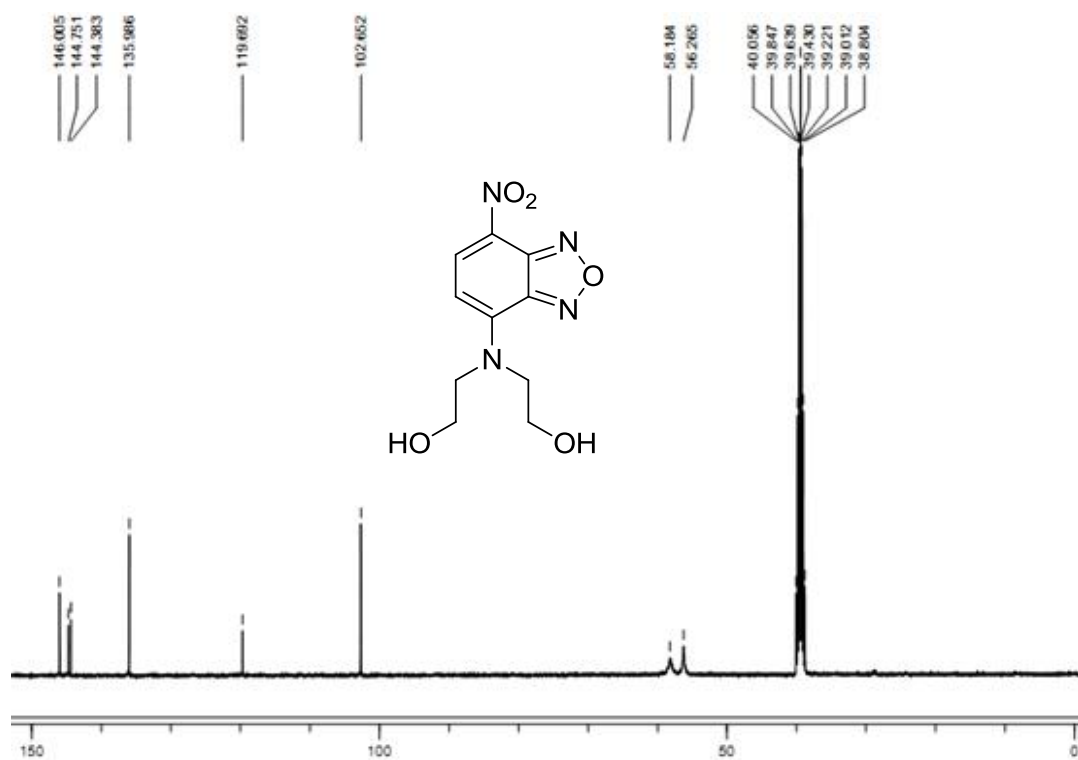

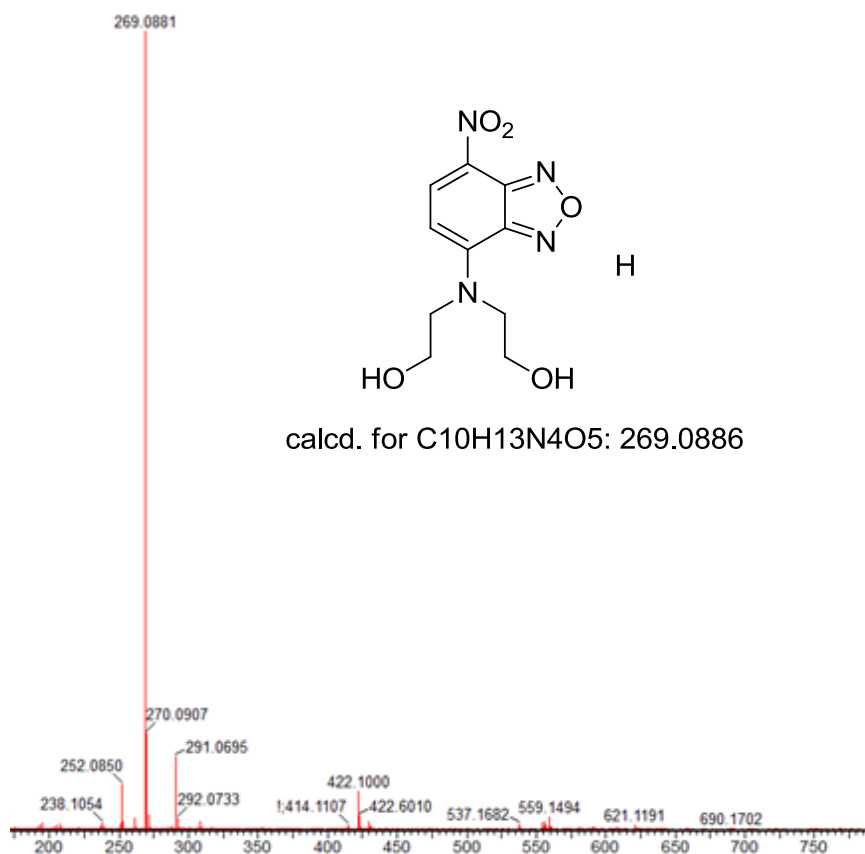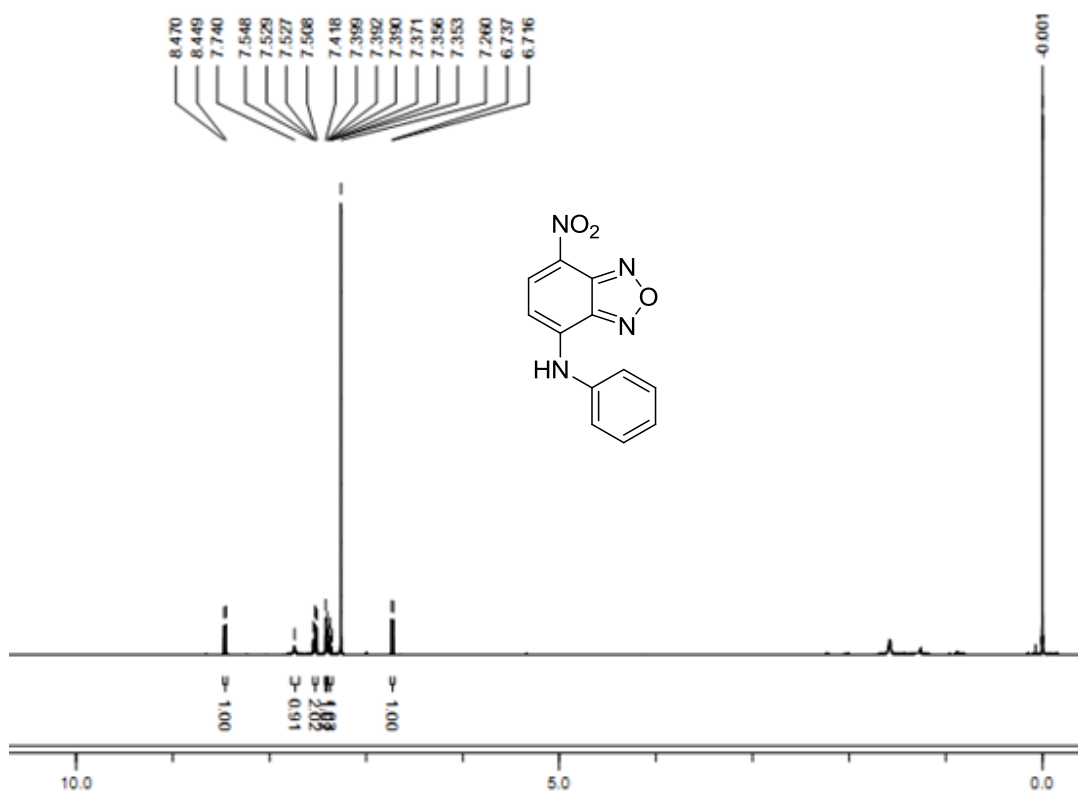

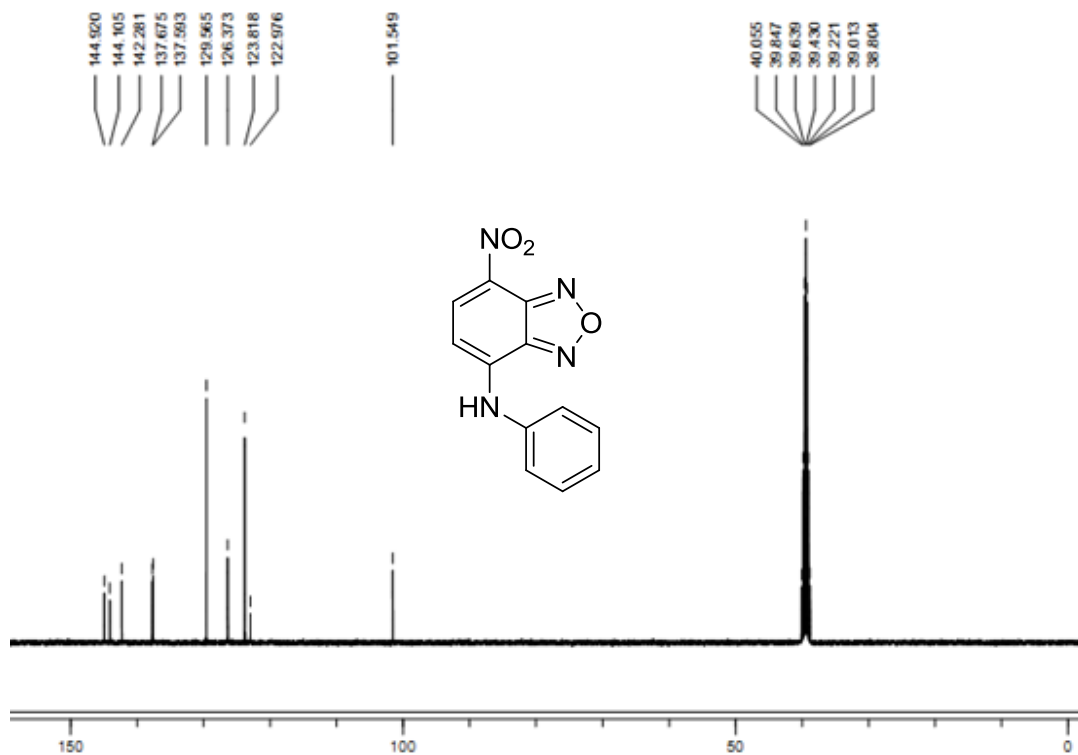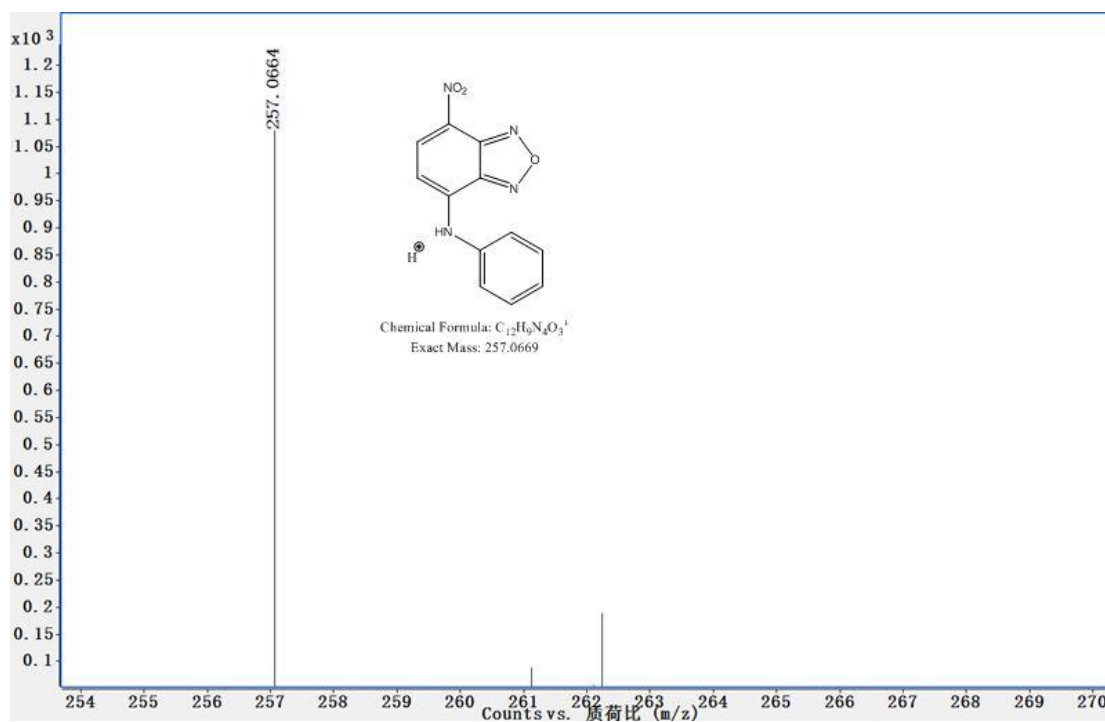

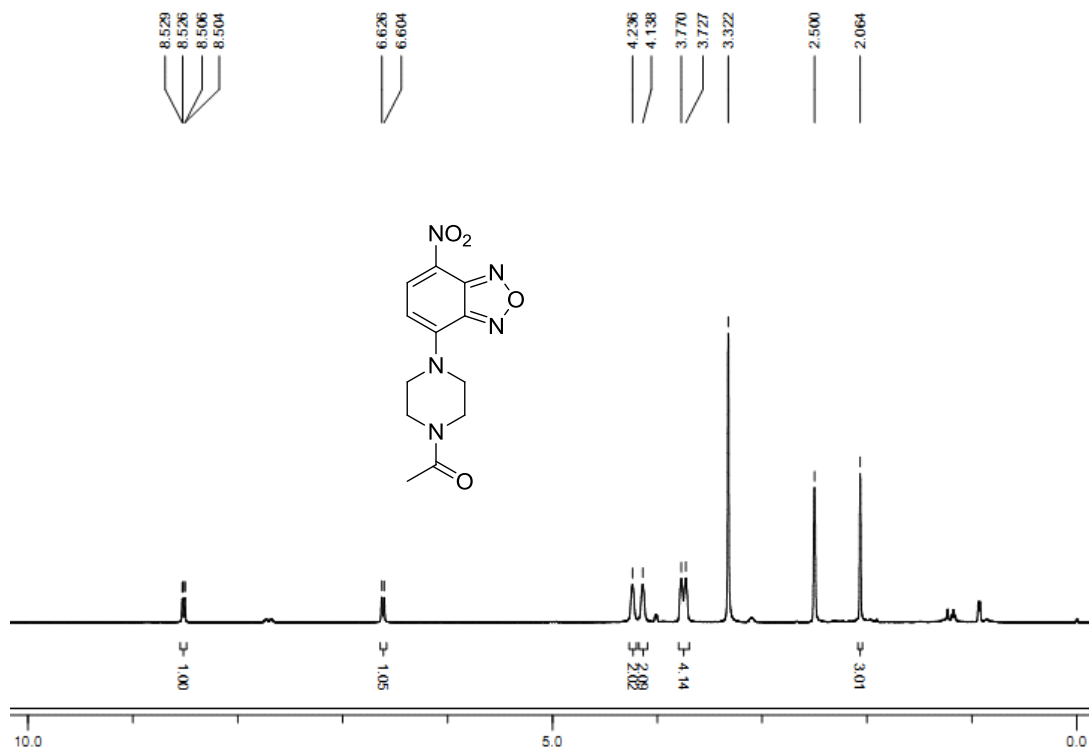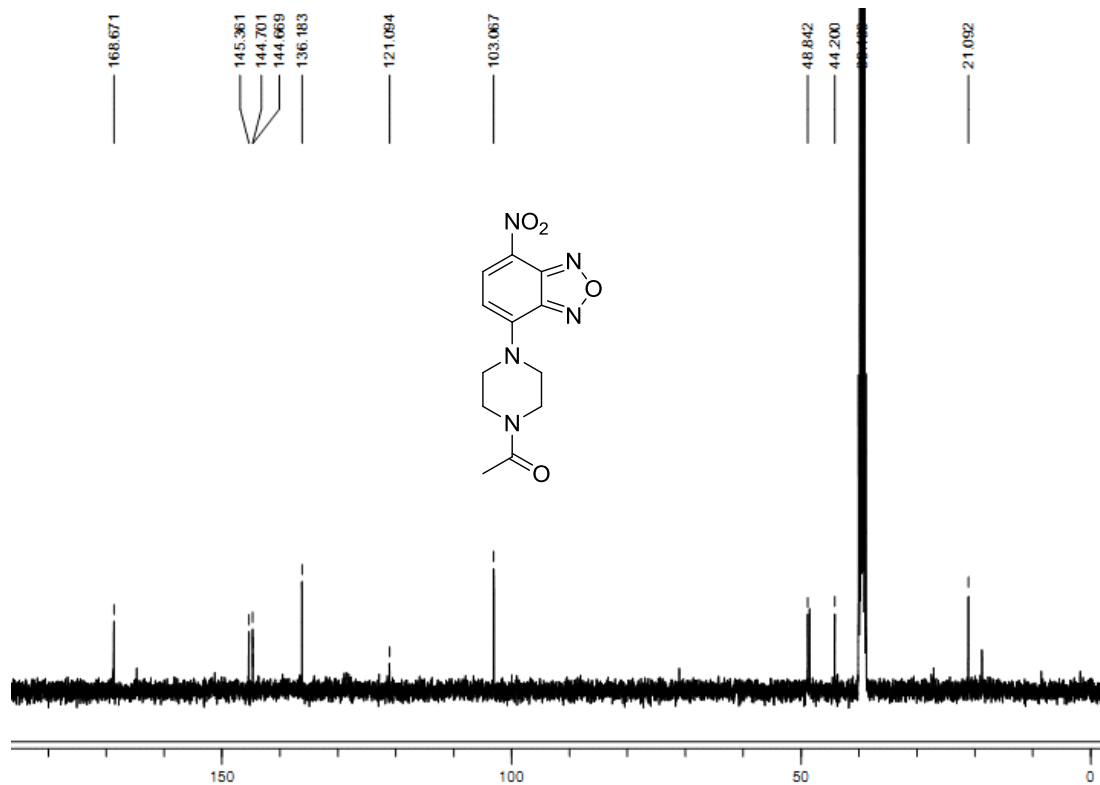

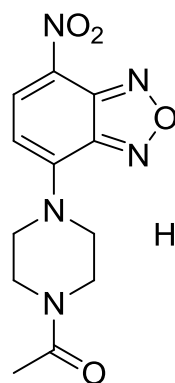

calcd. for C<sub>12</sub>H<sub>14</sub>N<sub>5</sub>O<sub>4</sub>: 292.1046

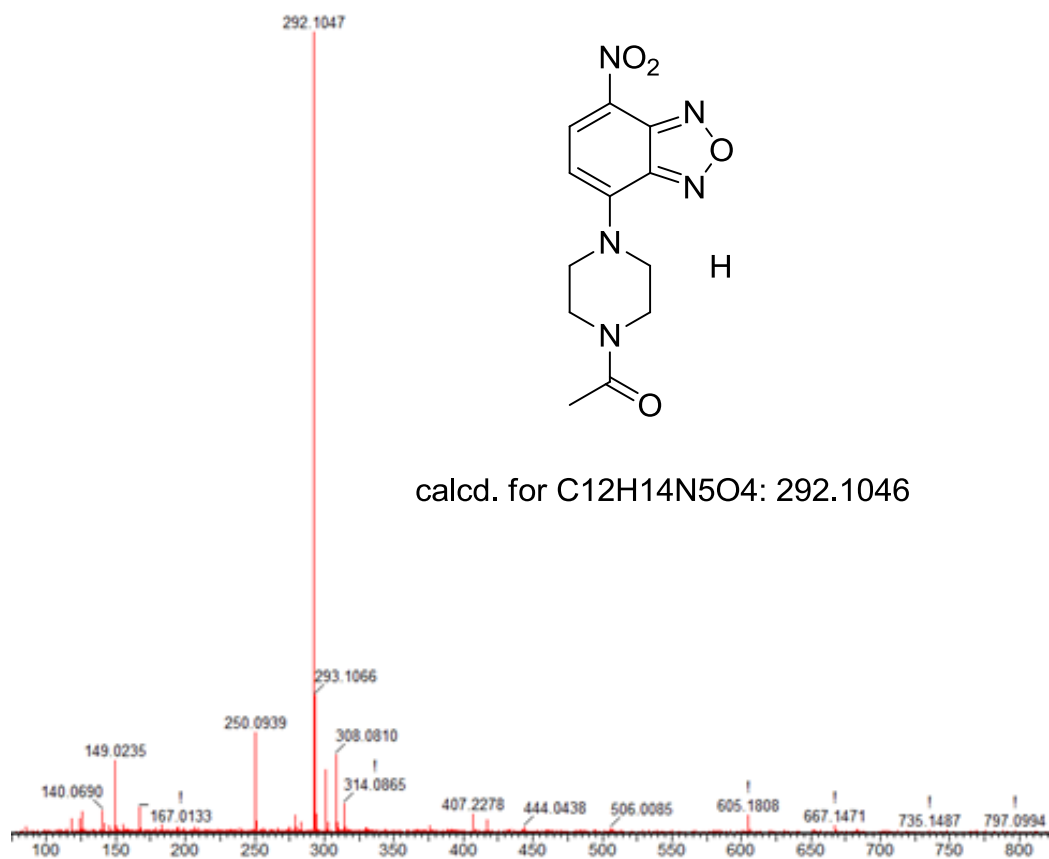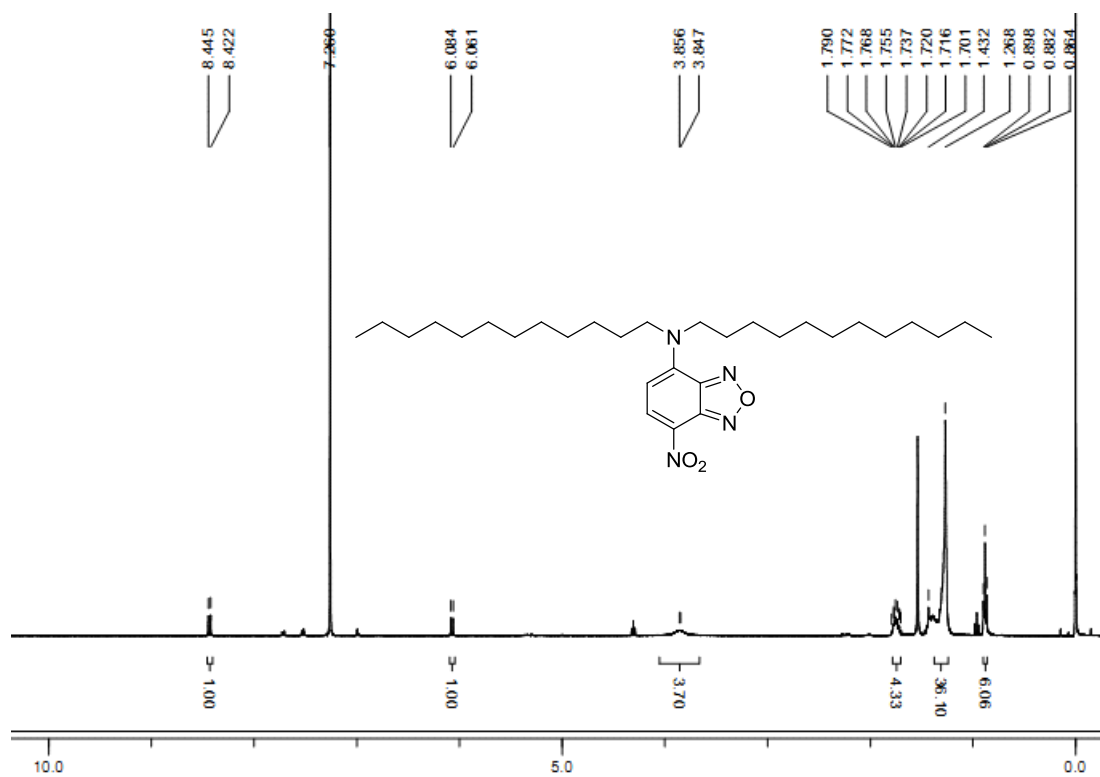

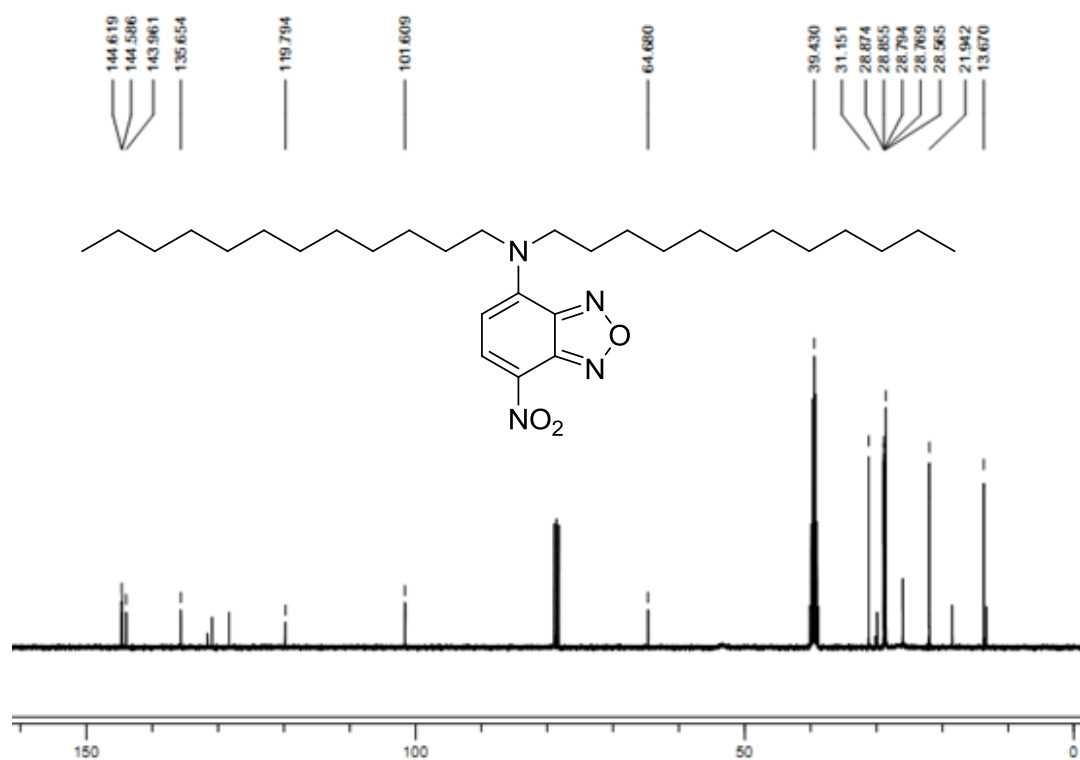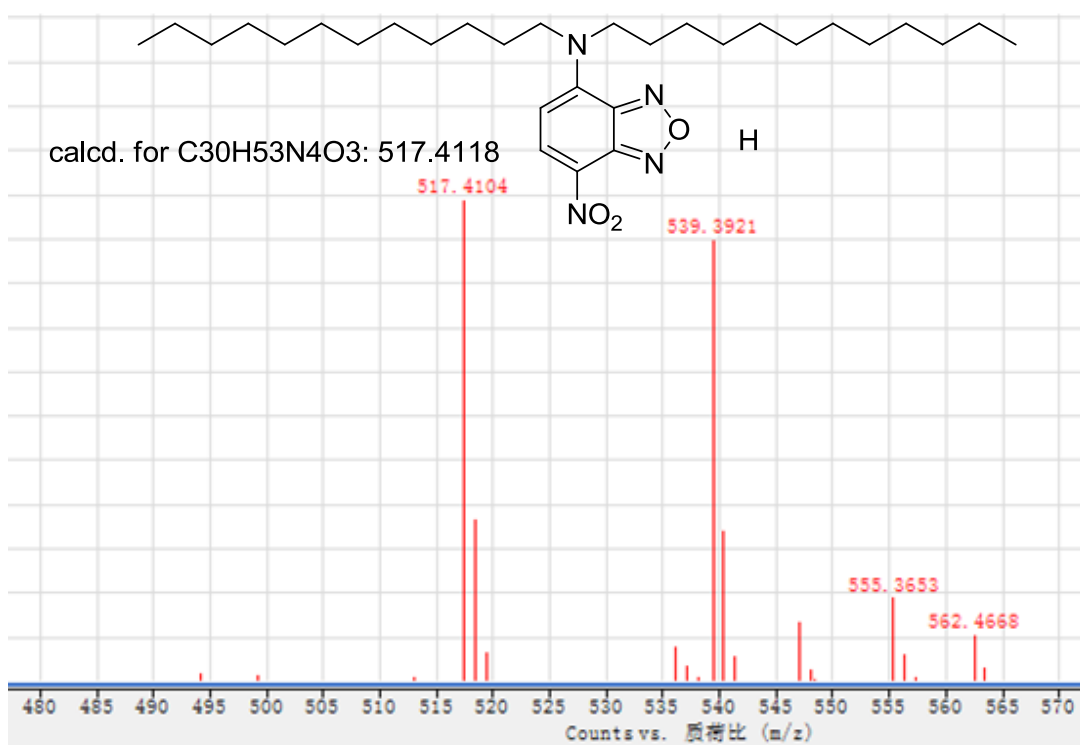

Supplement: c6ob02354a1.pdf [file c6ob02354a1.pdf]
